# Supplementary material
Source: PubMed Central journal article supplement (PMC3575460)

## **Supplemental Material to:**

**Xiaoqin Zhang, Jie Chen, Minhao Wu, Huakai Wu,  
Aloysius Wilfred Arokiaraj, Chengliang Wang,  
Weichang Zhang, Yue Tao, Michael S.Y. Huen  
and Jianye Zang**

**Structural basis for role of ring finger  
protein RNF168 RING domain**

**Cell Cycle 2012; 12(2)**

**<http://dx.doi.org/10.4161/cc.23104>**

**<http://www.landesbioscience.com/journals/cc/article/23104>**

## Supplementary Figures and Legends:

**Figure S1. RNF168 promotes protein ubiquitylation at DSBs.** (A) 293T cells transfected with Flag-epitope tagged RNF8 and RNF168 were irradiated (10 Gy) and processed for immunostaining experiments using indicated antibodies. (B) Quantification of results obtained in (A). (C) HeLa cells were transfected with indicated siRNAs twice at 24 hr interval. 48 hr post-transfection cells were irradiated, lysed, and  $\gamma$ H2AX molecules were immunoprecipitated under denaturing condition. Immunoprecipitants were separated by SDS-PAGE and Western blotting experiments were performed using indicated antibodies.

**Figure S2. Comparison of the central helix structure of RNF168 with that of TRAF6 (A), CHIP (B) and RNF8 (C).** The central helices of RNF168, TRAF6, CHIP and RNF8 are shown in a ribbon mode and colored green, cyan, pink and brown, respectively.

Figure S1

A

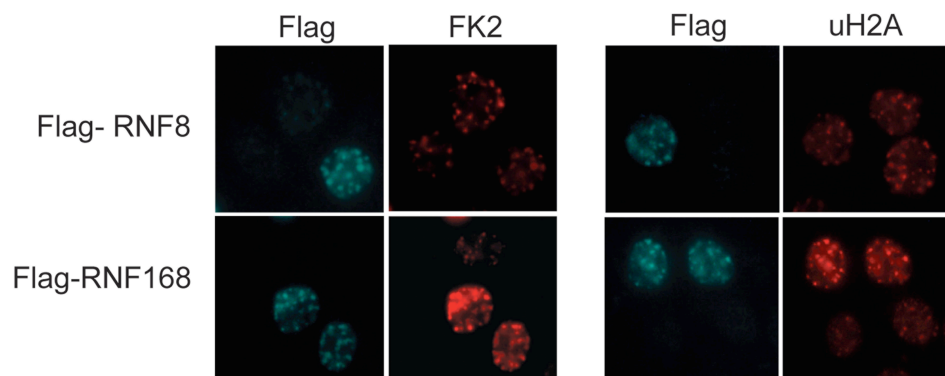

B

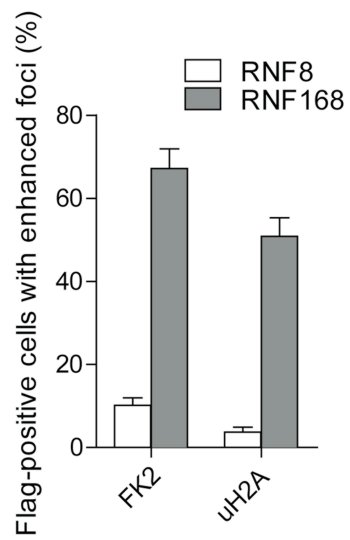

C

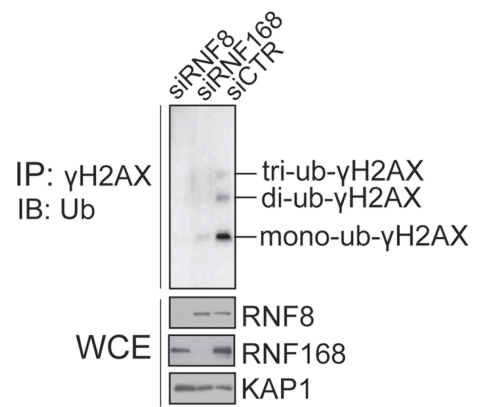

Figure S2

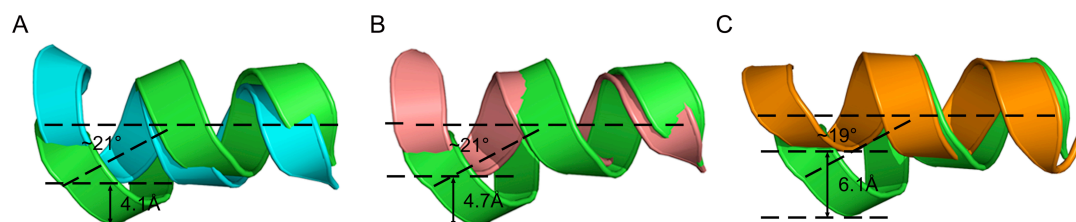

Supplement: cc-12-312-s01.pdf [file cc-12-312-s01.pdf]
